# Supplementary material
Source: PubMed Central journal article supplement (PMC1448685)
Supplement: jcm_44_4_1283__1.pdf [file jcm_44_4_1283__1.pdf]

### First study

n=24

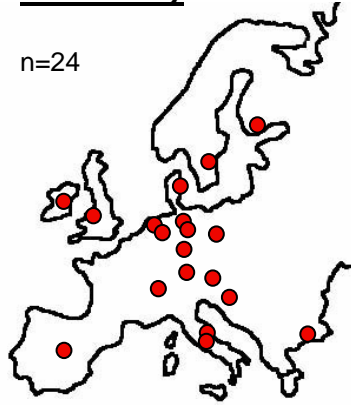

+Winnipeg, Canada  
+Tokio, Japan

### Distributed samples

Filoviruses n=7  
Lassa virus n=7  
Orthopox viruses n=13  
Negative samples n=2

### Evaluated skills

Average detection limit  
Fraction of laboratories  
fulfilling proficiency criterion  
Technical influence factors

### Second study

n=33

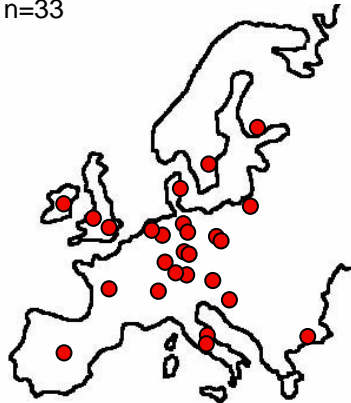

+Winnipeg, Canada  
+Buenos Aires, Argentina  
+Melbourne, Australia  
+Novosibirsk, Russia  
+Bangkok, Thailand

### Distributed samples

Orthopox viruses n=7  
Parapox virus n=1  
Yatapox virus n=1  
Negative samples n=6

### Evaluated skills

Average detection limit  
Relative detection limit in first-  
vs. second time participants  
Fraction of laboratories  
fulfilling proficiency criterion  
Contamination safety  
Quantification (by Genotype)  
Genotyping  
Recognition and removal of  
PCR inhibitors  
Technical influence factors
